# Supplementary material
Source: publisher site journal article supplement (https://www.dovepress.com/article/548786)
Supplement: Supplementary file 1 [file 548786_KEGG permission letter (3).pdf › 548786_KEGG permission letter (3).pdf]

Ref: 251657

Permission is granted to Critical Care to publish under the CC BY 4.0 open access license the following KEGG pathway map images in the article "The intestinal immune network for IgA production is involved in the development and progression of sepsis: a multi omics study" written by Yi-Feng Wang, Song Gao, Fei Gao, Mei-Li Wu, Lan Yang, Jia-Yue Zhang, Ya-Nan Wang, Hong-Yang Xu and colleagues:

- Intestinal immune network for IgA production (hsa04672)

subject to the condition that the original source is acknowledged by citing at least one KEGG paper.

Permission granted:



Naomi Takahashi, Kanehisa Laboratories

Date: 12 June 2025

Copyright holder: Kanehisa Laboratories
