# Supplementary material
Source: publisher site journal article supplement (https://www.dovepress.com/article/548786)
Supplement: Supplementary file 2 [file 548786_supplementary material_1 (2).pdf › 548786_supplementary material_1 (2).pdf]

Table S1. The details of bulk RNA sequencing datasets.

| Datasets  | Attributes   | Sample composition and groups                                                                          | Reasons for sample exclusion                                                                                              |
|-----------|--------------|--------------------------------------------------------------------------------------------------------|---------------------------------------------------------------------------------------------------------------------------|
| GSE65682  | Training     | 475 sepsis patients with exact 28-day survival status and specific survival time; 42 healthy controls. | Without prognostic information, or the information was contradictory (GSM1692149, GSM1692379, GSM1602888 and GSM1602942). |
| GSE57065  | Verification | 28 sepsis patients; 25 healthy controls.                                                               | Repeated sampling                                                                                                         |
| GSE95233  | Verification | 51 sepsis patients; 22 healthy controls.                                                               | Repeated sampling                                                                                                         |
| GSE131761 | Verification | 114 sepsis patients; 15 healthy controls.                                                              | -                                                                                                                         |
| GES134347 | Verification | 156 sepsis patients; 83 healthy controls.                                                              | -                                                                                                                         |

Table S2. The inclusion and exclusion criteria of the clinical trial.

| Criteria  | Groups  | Details                                                              |
|-----------|---------|----------------------------------------------------------------------|
| Inclusion | Sepsis  | 1. From the Department of Critical Care Medicine                     |
|           |         | 2. diagnosed per Sepsis-3 criteria                                   |
|           |         | 3. The same day admitted to the Department of Critical Care Medicine |
|           | Healthy | 1. From the Medical Examination Center                               |
|           |         | 2. On the same day of medical examination                            |
| Exclusion | Both    | 1. Less than 18 years old                                            |
|           |         | 2. Receiving immunosuppressive therapy in the past six months        |
|           |         | 3. Immune dysfunction state                                          |
|           |         | 4. Receiving gastrointestinal surgery in the past six months         |
|           |         | 5. Inflammatory bowel disease                                        |
|           |         | 6. Severe organ dysfunction                                          |
|           |         | 7. Massive blood transfusion                                         |
|           |         | 8. Pregnancy status or perinatal period                              |

Table S3. The primers used in RT-qPCR.

| Genes    | Forward primers         | Reverse primers         |
|----------|-------------------------|-------------------------|
| HLA-DPA1 | ATGCGCCCTGAAGACAGAATG   | ACACATGGTCCGCCTTGATG    |
| ITGB7    | CCATTCAGCTTTCACCATGTGC  | ACCTTCAGGCGAGTCCAGATT   |
| CXCR4    | ACGCCACCAACAGTCAGAG     | AGTCGGAATAGTCAGCAGGA    |
| ANKRD55  | AACATGCAGGATGCTTATGGC   | TGGCACCGTTTCTGAGTAGAC   |
| CX3CR1   | GTGTCACCGACATTTACCTCC   | AAGGCGGTAGTGAATTTGCAC   |
| GIMAP4   | AACTTGTCGTAGTTGACACACC  | GCGAATAATCTCCTTGGACGTTT |
| GAPDH    | ACAACCTTTGGTATCGTGGAAGG | GCCATCACGCCACAGTTTC     |

RT-qPCR, Real-Time Quantitative Polymerase Chain Reaction.

Table S4. The data source of the MR study.

| Exposures/Outcomes | Traits                                 | GWAS IDs               |
|--------------------|----------------------------------------|------------------------|
| HLA-DPA1           | ENSG00000231389                        | eqtl-a-ENSG00000231389 |
| ITGB7              | ENSG00000139626                        | eqtl-a-ENSG00000139626 |
| CXCR4              | ENSG00000121966                        | eqtl-a-ENSG00000121966 |
| ANKRD55            | ENSG00000164512                        | eqtl-a-ENSG00000164512 |
| CX3CR1             | ENSG00000168329                        | eqtl-a-ENSG00000168329 |
| GIMAP4             | ENSG00000133574                        | eqtl-a-ENSG00000133574 |
| Sepsis             | Sepsis                                 | ieu-b-69               |
| Sepsis mortality   | Sepsis (28-day death in critical care) | ieu-b-4981             |

MR, Mendelian Randomization.

Table S5. The IVs used in the MR study.

| Exposures | Outcomes         | SNP         | effect_allele.<br>exposure | other_allele.<br>exposure | effect_allele.<br>outcome | other_allele.<br>outcome | beta.<br>exposure | beta.<br>outcome | eaf.<br>exposure | eaf.<br>outcome | palindromic | ambiguous | chr | pos       | se.outcome | samplesize.<br>outcome | pval.<br>outcome | pval.<br>exposure | pos.<br>exposure | se.<br>exposure | chr.<br>exposure | samplesize.<br>exposure | FSTAT   |
|-----------|------------------|-------------|----------------------------|---------------------------|---------------------------|--------------------------|-------------------|------------------|------------------|-----------------|-------------|-----------|-----|-----------|------------|------------------------|------------------|-------------------|------------------|-----------------|------------------|-------------------------|---------|
| HLA-DPA1  | Sepsis           | rs11204677  | G                          | C                         | G                         | C                        | -0.054569         | -0.007879        | 0.526418         | 0.553023        | TRUE        | TRUE      | 1   | 150574695 | 0.0142648  | 462918                 | 0.53             | 4.62E-06          | 150574695        | 0.0119113       | 1                | 13006                   | 20.99   |
| HLA-DPA2  | Sepsis           | rs114390018 | T                          | C                         | T                         | C                        | -0.739853         | -0.017702        | 0.145242         | 0.175298        | FALSE       | FALSE     | 6   | 33029384  | 0.0187954  | 462918                 | 0.34             | 1.00E-200         | 33029384         | 0.015702        | 6                | 9175                    | 2219.66 |
| HLA-DPA3  | Sepsis           | rs13203715  | G                          | A                         | G                         | A                        | -0.389618         | 0.0330122        | 0.121006         | 0.114275        | FALSE       | FALSE     | 6   | 32988588  | 0.022271   | 462918                 | 0.22             | 1.92E-104         | 32988588         | 0.0179523       | 6                | 7572                    | 470.89  |
| HLA-DPA4  | Sepsis           | rs13330176  | A                          | T                         | A                         | T                        | -0.105538         | 0.0229334        | 0.21644          | 0.237962        | TRUE        | FALSE     | 16  | 86019087  | 0.0167907  | 462918                 | 0.11             | 2.55E-13          | 86019087         | 0.0144251       | 16               | 13344                   | 53.52   |
| HLA-DPA5  | Sepsis           | rs17658229  | C                          | T                         | C                         | T                        | -0.128883         | 0.0486155        | 0.0437999        | 0.047997        | FALSE       | FALSE     | 5   | 172191052 | 0.0334019  | 462918                 | 0.16             | 9.22E-06          | 172191052        | 0.0290624       | 5                | 13344                   | 19.66   |
| HLA-DPA6  | Sepsis           | rs2857218   | G                          | C                         | G                         | C                        | -0.05756          | 0.0100599        | 0.375694         | 0.389578        | TRUE        | FALSE     | 6   | 32855340  | 0.0145417  | 462918                 | 0.51             | 2.77E-06          | 32855340         | 0.0122798       | 6                | 6458                    | 21.96   |
| HLA-DPA7  | Sepsis           | rs386879    | A                          | T                         | A                         | T                        | 0.107118          | 0.0009337        | 0.294243         | 0.346631        | TRUE        | FALSE     | 6   | 33506733  | 0.0149207  | 462918                 | 0.52             | 2.01E-16          | 33506733         | 0.0130295       | 6                | 13340                   | 67.58   |
| HLA-DPA8  | Sepsis           | rs4705862   | T                          | A                         | T                         | A                        | -0.055897         | -0.006334        | 0.440695         | 0.431128        | TRUE        | TRUE      | 5   | 131813219 | 0.0143961  | 462918                 | 0.56             | 3.07E-06          | 131813219        | 0.0119789       | 5                | 13344                   | 21.77   |
| HLA-DPA9  | Sepsis           | rs7944584   | T                          | A                         | T                         | A                        | 0.0651286         | -0.005865        | 0.268509         | 0.276922        | TRUE        | FALSE     | 11  | 47336320  | 0.0158623  | 462918                 | 0.630001         | 1.21E-06          | 47336320         | 0.0134183       | 11               | 13344                   | 23.56   |
| HLA-DPA10 | Sepsis           | rs8026803   | C                          | T                         | C                         | T                        | -0.067733         | -0.031805        | 0.247924         | 0.260493        | FALSE       | FALSE     | 15  | 80260014  | 0.0161536  | 462918                 | 0.0929994        | 8.73E-07          | 80260014         | 0.0137715       | 15               | 13344                   | 24.19   |
| ITGB7     | Sepsis           | rs10423726  | A                          | C                         | A                         | C                        | -0.123182         | -0.011485        | 0.595533         | 0.58069         | FALSE       | FALSE     | 19  | 16444697  | 0.0151179  | 462918                 | 0.27             | 0.0120825         | 16444697         | 14496           | 19               | 2.09E-24                | 103.93  |
| ITGB8     | Sepsis           | rs11170231  | A                          | G                         | A                         | G                        | 0.10707           | 0.0250054        | 0.161433         | 0.15309         | FALSE       | FALSE     | 12  | 53068633  | 0.0199129  | 462918                 | 0.4              | 0.0161512         | 53068633         | 31355           | 12               | 3.38E-11                | 43.94   |
| ITGB9     | Sepsis           | rs11653357  | A                          | G                         | A                         | G                        | -0.075936         | -0.013067        | 0.17703          | 0.175134        | FALSE       | FALSE     | 17  | 33923607  | 0.0186474  | 462918                 | 0.39             | 0.0155799         | 33923607         | 31270           | 17               | 1.09E-06                | 23.75   |
| ITGB10    | Sepsis           | rs1354034   | C                          | T                         | C                         | T                        | -0.056313         | 0.0312447        | 0.618137         | 0.599112        | FALSE       | FALSE     | 3   | 56849749  | 0.0144583  | 462918                 | 0.02             | 0.0122412         | 56849749         | 31470           | 3                | 4.22E-06                | 21.16   |
| ITGB11    | Sepsis           | rs2280696   | T                          | A                         | T                         | A                        | 0.801045          | 0.0307945        | 0.0817348        | 0.056764        | TRUE        | FALSE     | 12  | 53512756  | 0.0306528  | 462918                 | 0.44             | 0.0206521         | 53512756         | 31135           | 12               | 1.00E-200               | 1504.38 |
| ITGB12    | Sepsis           | rs74088990  | G                          | A                         | G                         | A                        | 0.844415          | 0.0282628        | 0.0245041        | 0.031009        | FALSE       | FALSE     | 12  | 53593445  | 0.0414491  | 462918                 | 0.5              | 0.0378339         | 53593445         | 26388           | 12               | 2.42E-110               | 498.10  |
| ITGB13    | Sepsis           | rs9420589   | T                          | G                         | T                         | G                        | -0.059749         | -0.015622        | 0.428682         | 0.433552        | FALSE       | FALSE     | 10  | 94450233  | 0.0143365  | 462918                 | 0.23             | 0.0120159         | 94450233         | 31270           | 10               | 6.61E-07                | 24.72   |
| CXCR4     | Sepsis           | rs10098310  | A                          | G                         | A                         | G                        | 0.064501          | 0.0074328        | 0.575007         | 0.570067        | FALSE       | FALSE     | 8   | 130613614 | 0.0144323  | 462918                 | 0.44             | 8.19E-08          | 31355            | 130613614       | 0.0120275        | 8                       | 28.76   |
| CXCR5     | Sepsis           | rs11897084  | G                          | A                         | G                         | A                        | 0.0791658         | 0.0332864        | 0.538148         | 0.558763        | FALSE       | FALSE     | 2   | 136861225 | 0.0143517  | 462918                 | 0.012            | 3.10E-11          | 31468            | 136861225       | 0.0119197        | 2                       | 44.11   |
| CXCR6     | Sepsis           | rs56388170  | T                          | G                         | T                         | G                        | -0.084325         | -0.010373        | 0.289189         | 0.2928          | FALSE       | FALSE     | 7   | 28724374  | 0.0157155  | 462918                 | 0.47             | 1.25E-10          | 31141            | 28724374        | 0.0131081        | 7                       | 41.38   |
| ANKRD55   | Sepsis mortality | rs1040555   | T                          | A                         | T                         | A                        | 0.0586246         | -0.107567        | 0.451876         | 0.444514        | TRUE        | TRUE      | 20  | 31380201  | 0.0795846  | 431365                 | 0.176503         | 0.0119488         | 20               | 9.29E-07        | 31355            | 31380201                | 24.07   |
| ANKRD56   | Sepsis mortality | rs112861549 | G                          | A                         | G                         | A                        | 0.301594          | 0.254141         | 0.0323343        | 0.0360886       | FALSE       | FALSE     | 5   | 55134598  | 0.213189   | 431365                 | 0.233224         | 0.0335514         | 5                | 2.50E-19        | 30252            | 55134598                | 80.80   |
| ANKRD57   | Sepsis mortality | rs11649653  | G                          | C                         | G                         | C                        | 0.0791747         | 0.0142496        | 0.393125         | 0.382613        | TRUE        | FALSE     | 16  | 30918487  | 0.0803932  | 431365                 | 0.859313         | 0.0121669         | 16               | 7.66E-11        | 30757            | 30918487                | 42.34   |
| ANKRD58   | Sepsis mortality | rs11920354  | A                          | C                         | A                         | C                        | -0.075343         | -0.097901        | 0.372903         | 0.388519        | FALSE       | FALSE     | 3   | 47262246  | 0.0804619  | 431365                 | 0.223704         | 0.0122914         | 3                | 8.80E-10        | 28703            | 47262246                | 37.57   |
| ANKRD59   | Sepsis mortality | rs12044149  | T                          | G                         | T                         | G                        | -0.063226         | -0.135292        | 0.252725         | 0.254585        | FALSE       | FALSE     | 1   | 67600686  | 0.0900253  | 431365                 | 0.132886         | 0.0136852         | 1                | 3.84E-06        | 31469            | 67600686                | 21.34   |
| ANKRD60   | Sepsis mortality | rs13062095  | C                          | T                         | C                         | T                        | -0.057412         | -0.044348        | 0.350092         | 0.336096        | FALSE       | FALSE     | 3   | 101267385 | 0.0836039  | 431365                 | 0.595795         | 0.0124681         | 3                | 4.13E-06        | 31355            | 101267385               | 21.20   |
| ANKRD61   | Sepsis mortality | rs13163043  | G                          | A                         | G                         | A                        | -0.372751         | -0.087153        | 0.0309123        | 0.0381432       | FALSE       | FALSE     | 5   | 55579422  | 0.204333   | 431365                 | 0.669726         | 0.0342438         | 5                | 1.35E-27        | 28088            | 55579422                | 118.48  |
| ANKRD62   | Sepsis mortality | rs138752204 | G                          | A                         | G                         | A                        | 0.394997          | 0.142137         | 0.0169951        | 0.017454        | FALSE       | FALSE     | 5   | 55102584  | 0.311619   | 431365                 | 0.6483           | 0.0459272         | 5                | 7.94E-18        | 24602            | 55102584                | 73.96   |
| ANKRD63   | Sepsis mortality | rs141453671 | T                          | C                         | T                         | C                        | -0.390461         | 0.0279633        | 0.0347493        | 0.0409042       | FALSE       | FALSE     | 5   | 55517699  | 0.206323   | 431365                 | 0.892192         | 0.032331          | 5                | 1.40E-33        | 29437            | 55517699                | 145.84  |
| ANKRD64   | Sepsis mortality | rs146345203 | A                          | C                         | A                         | C                        | -0.272648         | -0.192704        | 0.0271935        | 0.0311643       | FALSE       | FALSE     | 5   | 55630755  | 0.227811   | 431365                 | 0.397613         | 0.0365211         | 5                | 8.29E-14        | 29058            | 55630755                | 55.73   |
| ANKRD65   | Sepsis mortality | rs147231428 | G                          | A                         | G                         | A                        | -0.383156         | 0.392549         | 0.0146409        | 0.0084699       | FALSE       | FALSE     | 5   | 55555585  | 0.426328   | 431365                 | 0.357172         | 0.0494472         | 5                | 9.28E-15        | 21834            | 55555585                | 60.04   |
| ANKRD66   | Sepsis mortality | rs2609255   | T                          | G                         | T                         | G                        | 0.0624272         | -0.121931        | 0.760626         | 0.787116        | FALSE       | FALSE     | 4   | 89811195  | 0.0961233  | 431365                 | 0.204623         | 0.0139384         | 4                | 7.51E-06        | 31470            | 89811195                | 20.06   |
| ANKRD67   | Sepsis mortality | rs3184504   | C                          | T                         | C                         | T                        | -0.078405         | 0.0239425        | 0.542056         | 0.517667        | FALSE       | FALSE     | 12  | 111884608 | 0.0788562  | 431365                 | 0.761416         | 0.0119276         | 12               | 4.91E-11        | 28204            | 111884608               | 43.21   |
| ANKRD68   | Sepsis mortality | rs3774959   | A                          | G                         | A                         | G                        | 0.126657          | -0.085433        | 0.352643         | 0.372497        | FALSE       | FALSE     | 4   | 103511114 | 0.0815151  | 431365                 | 0.294608         | 0.0124111         | 4                | 1.88E-24        | 31355            | 103511114               | 104.14  |
| ANKRD69   | Sepsis mortality | rs62359589  | T                          | C                         | T                         | C                        | -0.200409         | -0.029808        | 0.0349461        | 0.0355449       | FALSE       | FALSE     | 5   | 54839646  | 0.212326   | 431365                 | 0.888352         | 0.0323654         | 5                | 5.93E-10        | 25550            | 54839646                | 38.34   |
| ANKRD70   | Sepsis mortality | rs6457374   | T                          | C                         | T                         | C                        | -0.091439         | -0.047403        | 0.754006         | 0.70412         | FALSE       | FALSE     | 6   | 31272261  | 0.0865871  | 431365                 | 0.584059         | 0.0137981         | 6                | 3.43E-11        | 30389            | 31272261                | 43.91   |
| ANKRD71   | Sepsis mortality | rs6873385   | A                          | T                         | A                         | T                        | -0.718993         | 0.0610851        | 0.195603         | 0.205847        | TRUE        | FALSE     | 5   | 55436851  | 0.0980869  | 431365                 | 0.533439         | 0.0137299         | 5                | 1.00E-200       | 25941            | 55436851                | 2742.09 |
| ANKRD72   | Sepsis mortality | rs6890853   | A                          | G                         | A                         | G                        | 0.0632219         | -0.048003        | 0.27143          | 0.279205        | FALSE       | FALSE     | 5   | 35852311  | 0.0875065  | 431365                 | 0.583307         | 0.0133732         | 5                | 2.27E-06        | 31355            | 35852311                | 22.35   |
| ANKRD73   | Sepsis mortality | rs7090504   | A                          | T                         | A                         | T                        | 0.0678845         | -0.051848        | 0.204318         | 0.20099         | TRUE        | FALSE     | 10  | 6091017   | 0.0984669  | 431365                 | 0.598501         | 0.0147501         | 10               | 4.18E-06        | 31470            | 6091017                 | 21.18   |
| ANKRD74   | Sepsis mortality | rs72752253  | T                          | C                         | T                         | C                        | 0.263669          | -0.067221        | 0.0233297        | 0.0276445       | FALSE       | FALSE     | 5   | 55647811  | 0.238578   | 431365                 | 0.778132         | 0.0393665         | 5                | 2.12E-11        | 28929            | 55647811                | 44.86   |
| ANKRD75   | Sepsis mortality | rs72928038  | A                          | G                         | A                         | G                        | -0.117706         | -0.153033        | 0.158151         | 0.17888         | FALSE       | FALSE     | 6   | 90976768  | 0.102723   | 431365                 | 0.136285         | 0.0162813         | 6                | 4.84E-13        | 28899            | 90976768                | 52.26   |
| ANKRD76   | Sepsis mortality | rs78157088  | G                          | A                         | G                         | A                        | 0.184571          | 0.184647         | 0.0233865        | 0.0209667       | FALSE       | FALSE     | 5   | 55660376  | 0.275322   | 431365                 | 0.502439         | 0.0393516         | 5                | 2.73E-06        | 29234            | 55660376                | 22.00   |
| ANKRD77   | Sepsis mortality | rs8078723   | C                          | T                         | C                         | T                        | -0.0714           | -0.074819        | 0.379928         | 0.386449        | FALSE       | FALSE     | 17  | 38166879  | 0.0806701  | 431365                 | 0.353682         | 0.0122476         | 17               | 5.55E-09        | 31470            | 38166879                | 33.98   |
| ANKRD78   | Sepsis mortality | rs917116    | G                          | T                         | G                         | T                        | -0.14661          | 0.0072217        | 0.250264         | 0.213161        | FALSE       | FALSE     | 7   | 28172739  | 0.0956594  | 431365                 | 0.939822         | 0.0136846         | 7                | 8.79E-27        | 31355            | 28172739                | 114.77  |
| ANKRD79   | Sepsis mortality | rs934734    | A                          | G                         | A                         | G                        | -0.055674         | -0.141676        | 0.52687          | 0.493921        | FALSE       | FALSE     | 2   | 65595586  | 0.0782764  | 431365                 | 0.070304         | 0.0119115         | 2                | 2.95E-06        | 30971            | 65595586                | 21.84   |
| ANKRD80   | Sepsis mortality | rs9525625   | C                          | T                         | C                         | T                        | 0.0740444         | -0.080441        | 0.522329         | 0.528342        | FALSE       | FALSE     | 13  | 43018030  | 0.0788814  | 431365                 | 0.307834         | 0.0118991         | 13               | 4.88E-10        | 31355            | 43018030                | 38.72   |
| CX3CR1    | Sepsis mortality | rs10732976  | A                          | G                         | A                         | G                        | -0.063266         | -0.032057        | 0.704724         | 0.695854        | FALSE       | FALSE     | 1   | 185409061 | 0.0858752  | 431365                 | 0.708928         | 1.22E-06          | 1                | 0.0130364       | 30780            | 185409061               | 23.55   |
| CX3CR2    | Sepsis mortality | rs11711752  | G                          | A                         | G                         | A                        | 0.282659          | -0.069241        | 0.915285         | 0.915994        | FALSE       | FALSE     | 3   | 39294618  | 0.143138   | 431365                 | 0.628575         | 2.10E-40          | 3                | 0.0212412       | 30769            | 39294618                | 177.07  |
| CX3CR3    | Sepsis mortality | rs1354034   | C                          | T                         | C                         | T                        | -0.080547         | -0.057012        | 0.618137         | 0.598138        | FALSE       | FALSE     | 3   | 56849749  | 0.0800281  | 431365                 | 0.476218         | 4.55E-11          | 3                | 0.0122316       | 30895            | 56849749                | 43.36   |
| CX3CR4    | Sepsis mortality | rs55908509  | A                          | G                         | A                         | G                        | -0.106195         | 0.0956827        | 0.3284           | 0.327732        | FALSE       | FALSE     | 19  | 16442019  | 0.0834993  | 431365                 | 0.251833         | 4.44E-17          | 19               | 0.0126417       | 21915            | 16442019                | 70.56   |
| CX3CR5    |                  |             |                            |                           |                           |                          |                   |                  |                  |                 |             |           |     |           |            |                        |                  |                   |                  |                 |                  |                         |         |

Table S6. The main results of the MR study.

| Exposures | Outcomes         | Number of SNPs | Methods         | OR (95% CI)        | P value |
|-----------|------------------|----------------|-----------------|--------------------|---------|
| HLA-DPA1  | Sepsis           | 10             | IVW             | 1.00 (0.95, 1.05)  | 0.921   |
|           |                  | 10             | MR Egger        | 1.01 (0.94, 1.08)  | 0.867   |
|           |                  | 10             | Weighted median | 1.02 (0.97, 1.07)  | 0.418   |
|           |                  | 10             | Weighted mode   | 1.01 (0.96, 1.06)  | 0.757   |
| ITGB7     | Sepsis           | 7              | IVW             | 1.04 (0.98, 1.11)  | 0.195   |
|           |                  | 7              | MR Egger        | 1.04 (0.96, 1.13)  | 0.383   |
|           |                  | 7              | Weighted median | 1.04 (0.98, 1.10)  | 0.227   |
|           |                  | 7              | Weighted mode   | 1.04 (0.98, 1.10)  | 0.245   |
| CXCR4     | Sepsis           | 3              | IVW             | 1.27 (1.02, 1.58)  | 0.036   |
|           |                  | 3              | MR Egger        | 1.79 (0.15, 22.02) | 0.729   |
|           |                  | 3              | Weighted median | 1.18 (0.89, 1.55)  | 0.246   |
|           |                  | 3              | Weighted mode   | 1.13 (0.78, 1.62)  | 0.583   |
| ANKRD55   | Sepsis mortality | 26             | IVW             | 1.00 (0.81, 1.24)  | 0.981   |
|           |                  | 26             | MR Egger        | 0.93 (0.71, 1.24)  | 0.64    |
|           |                  | 26             | Weighted median | 0.92 (0.71, 1.19)  | 0.528   |
|           |                  | 26             | Weighted mode   | 0.95 (0.73, 1.23)  | 0.703   |
| CX3CR1    | Sepsis mortality | 8              | IVW             | 0.84 (0.56, 1.25)  | 0.382   |
|           |                  | 8              | MR Egger        | 0.61 (0.33, 1.11)  | 0.154   |
|           |                  | 8              | Weighted median | 0.81 (0.50, 1.32)  | 0.396   |
|           |                  | 8              | Weighted mode   | 0.76 (0.47, 1.23)  | 0.309   |
| GIMAP     | Sepsis mortality | 9              | IVW             | 0.76 (0.60, 0.98)  | 0.032   |
|           |                  | 9              | MR Egger        | 0.86 (0.63, 1.19)  | 0.400   |
|           |                  | 9              | Weighted median | 0.79 (0.61, 1.03)  | 0.080   |
|           |                  | 9              | Weighted mode   | 0.79 (0.61, 1.03)  | 0.122   |

MR, Mendelian Randomization; IVW, Inverse-Variance Weighted.

Table S7. The heterogeneity, pleiotropy and direction analyses of the MR study.

| Exposures | Outcomes         | Heterogeneity (IVW) |         | Heterogeneity (MR Egger) |         | Pleiotropy      |         | Direction                        |                                 |
|-----------|------------------|---------------------|---------|--------------------------|---------|-----------------|---------|----------------------------------|---------------------------------|
|           |                  | Q statistic         | P value | Q statistic              | P value | Egger Intercept | P value | SNP_r <sup>2</sup><br>(Exposure) | SNP_r <sup>2</sup><br>(Outcome) |
| HLA-DPA1  | Sepsis           | 12.0                | 0.211   | 12.0                     | 0.151   | -0.001          | 0.875   | 0.176                            | 2.5E-05                         |
| ITGB7     | Sepsis           | 7.8                 | 0.254   | 7.8                      | 0.168   | 0.000           | 0.981   | 0.058                            | 2.28E-05                        |
| CXCR4     | Sepsis           | 1.7                 | 0.429   | 1.6                      | 0.209   | -0.026          | 0.832   | 0.004                            | 1.6E-05                         |
| ANKRD55   | Sepsis mortality | 21.3                | 0.677   | 20.7                     | 0.655   | 0.020           | 0.458   | 0.080                            | 4.93E-05                        |
| CX3CR1    | Sepsis mortality | 6.6                 | 0.469   | 4.6                      | 0.590   | 0.072           | 0.209   | 0.033                            | 1.71E-05                        |
| GIMAP4    | Sepsis mortality | 5.4                 | 0.711   | 3.9                      | 0.787   | -0.097          | 0.261   | 0.054                            | 2.32E-05                        |

MR, Mendelian Randomization.
